# Supplementary material
Source: publisher site journal article supplement (https://www.spandidos-publications.com/8247/downloadSupplementary)
Supplement: Supplementary file 1 [file downloadSupplementary]

**Table SI.** Sequences of primers used for reverse transcription-quantitative PCR.

| <b>Gene name</b>    | <b>Primer sequence (5'-3')</b> | <b>Size (bp)</b> |
|---------------------|--------------------------------|------------------|
| SLC12A2 (Rat)       | F: TTCAATCCGTCTTTCCGGGG        | 674              |
|                     | R: GTGGCTGAGTTGAAGTCTTGC       |                  |
| SLC12A4 (Rat)       | F: GGCTCAGTTGGGTGGACTAC        | 866              |
|                     | R: CAGCATGCACACCGGAAAAA        |                  |
| GAPDH (Rat)         | F: ACGGAAACCCATCACCATC         | 338              |
|                     | R: AGTGATGGCATGGACTGTGG        |                  |
| VCAM1 (Rat)         | F: GAGGGTCTACCAGCTCCTGA        | 225              |
|                     | R: CACCTGAGATCCAGGGGAGA        |                  |
| ICAM1 (Rat)         | F: AGGGGAATCCAGCCCCTAAT        | 332              |
|                     | R: CGGGGCTTGTACCTTGAGTT        |                  |
| PECAM-1 (Rat)       | F: CGTCACTGTGCAGGAGTTCT        | 232              |
|                     | R: CGTGTAGTGTCCACTGTGCT        |                  |
| VE-cadherin (Rat)   | F: TGACAGCAACGGATGCAGAT        | 730              |
|                     | R: CTGTCCTGGTCTTGCGGAT         |                  |
| E-Selectin (Rat)    | F: TCACGGTGAATGCGTTGAGA        | 654              |
|                     | R: CACTGGGAAGCTTTGCACAC        |                  |
| P-Selectin (Rat)    | F: AACAGCAGCTGCACTTTTCG        | 751              |
|                     | R: GGTGGTGTGACAGGACATT         |                  |
| SLC12A2 (Mouse)     | F: GTGGGTTTCGTGTGTTGTTTCG      | 601              |
|                     | R: CATATGTGAGCAACGCAGCC        |                  |
| VCAM1 (Mouse)       | F: GTCACGGTCAAGTGTGGC          | 567              |
|                     | R: AGATCCGGGGGAGATGTCAA        |                  |
| ICAM1 (Mouse)       | F: TTCGTTTCCGGAGAGTGTGG        | 965              |
|                     | R: TAGGAGATGGGTCCCCCAG         |                  |
| PECAM-1 (Mouse)     | F: AAATCAAGCCCCCTGGGATG        | 772              |
|                     | R: ACCCTGACCCTCAGGATCTC        |                  |
| VE-cadherin (Mouse) | F: ATGGCAGGCCCTAACTTTCC        | 387              |
|                     | R: GTGCGAAAACACAGGCCAAT        |                  |
| E-Selectin (Mouse)  | F: TGGTGGCGATTCAGAGCGAGGA      | 577              |
|                     | R: TGGCAGGCAGGAGCAGGTG         |                  |
| P-Selectin (Mouse)  | F: ATACCTGCTCCTGCTACCCA        | 676              |
|                     | R: AAGGTACCGAAGGGATCCGA        |                  |
| GAPDH (Mouse)       | F: TGTGGGCATCAATGGATTTGG       | 116              |
|                     | R: ACACCATGTATTCCGGGTCAAT      |                  |

F, forward; R, reverse.

**Table SII.** Specific antibody information.

| <b>Antibody (Primary/secondary)</b> | <b>Supplier</b>                 | <b>Cat. no.</b> | <b>Dilution ratio</b> |
|-------------------------------------|---------------------------------|-----------------|-----------------------|
| Caspase 3 (P)                       | Affinity Biosciences            | AF6311          | 1:500                 |
| Cleaved caspase 3 (P)               | Affinity Biosciences            | AF7022          | 1:500                 |
| Bax (P)                             | Abcam                           | ab32503         | 1:1,000               |
| TNF- $\alpha$ (P)                   | Abcam                           | ab205587        | 1:1,000               |
| IL-1 $\beta$ (P)                    | Abcam                           | ab254360        | 1:1,000               |
| VEGF (P)                            | Cell Signaling Technology, Inc. | #9698           | 1:1,000               |
| BCL-2 (P)                           | Abcam                           | ab194583        | 1:500                 |
| SLC12A2 (P)                         | Affinity Biosciences            | DF2245          | 1:500                 |
| VCAM1 (P)                           | Affinity Biosciences            | DF6082          | 1:500                 |
| ICAM1 (P)                           | Affinity Biosciences            | AF6088          | 1:500                 |
| PECAM-1 (P)                         | Affinity Biosciences            | AF6191          | 1:500                 |
| VE-cadherin (P)                     | Affinity Biosciences            | AF6265          | 1:500                 |
| E-Selectin (P)                      | Affinity Biosciences            | DF6914          | 1:500                 |
| P-Selectin (P)                      | Affinity Biosciences            | DF6536          | 1:500                 |
| CD31 (P)                            | Abcam                           | ab222783        | 1:100                 |
| GAPDH (P)                           | Abcam                           | ab181602        | 1:1,000               |
| Goat Anti-Rabbit IgG H&L (S)        | Abcam                           | ab205718        | 1:50,000              |
